# Supplementary material
Source: publisher site journal article supplement (https://en-cdn.bio-protocol.org/attached/file/20220410/Supplementary%20file%20Python%20code.docx)
Supplement: Supplementary file 1 [file Supplementary%20file%20Python%20code.docx]

**Python code for visualizing and analyzing the growth curve data from microplate readers**

*Note: The code was written with Python 3.7, and tested for Python 3.7, 3.8, and 3.9.*

| # The OD and fluorescence data of the blank, sample S1, and sample S2 are stored in “blank_od.txt”, “blank_fl.txt”, “s1_fl.txt”, “s1_fl.txt”, “s2_od.txt”, “s2_fl.txt”, respectively.  # %% import packages  import matplotlib.pyplot as plt  import matplotlib as mpl  mpl.rcParams['font.size'] = 20  import numpy as np  import pandas as pd  from scipy.integrate import odeint  from scipy.optimize import curve_fit  from scipy.signal import find_peaks, peak_widths  # %% define useful functions  def ave(data):  '''calculate the mean'''  return data.mean(axis=1)  def std(data):  '''calculate the standard deviation'''  return data.std(axis=1)  def sem(data):  '''calculate the error (standard error of the mean)'''  return data.std(axis=1)/np.sqrt(data.shape[-1])  def calc_stats(sample_fn, blank_fn, dt=10.0/60.0, convfac=1):  ''' calculate the statistics at all time points for the data stored in file [data_fn]  ==== Parameters ====  * sample_fn: file name of the sample data file  * blank_fn: file name of the blank data file  * dt: time interval in hr (default: 10/60 hr = 10 min)  * convfac: conversion factor for presenting the data (default: 1)  ==== Returns ====  * t: time  * sample_ave: mean values  * sample_err: errors  '''  blank = np.loadtxt(blank_fn)  sample = np.loadtxt(sample_fn)  if blank.shape[0] == sample.shape[0]:  t = np.arange(0, blank.shape[0])*dt  sample_ave = (ave(sample) - ave(blank))*convfac  sample_err = np.sqrt(sem(sample)**2+sem(blank)**2)  return (t, sample_ave, sample_err)  else:  print('Error: blank and sample do not have the same number of data/time points')  return None  def remove_baseline_from_data(sample_fn, blank_fn):  ''' remove the baseline from sample data (baseline = average of blank data)  ==== Parameters ====  * sample_fn: file name of the sample data file  * blank_fn: file name of the blank data file  ==== Returns ====  * new_sample_data: array  '''  blank = np.loadtxt(blank_fn)  sample = np.loadtxt(sample_fn)  new_sample_data = np.zeros_like(sample)  baseline = ave(blank)  if blank.shape[0] == sample.shape[0]:  for col in range(sample.shape[-1]):  new_sample_data[:,col] = sample[:,col] - baseline  return new_sample_data  else:  print('Error: blank and sample do not have the same number of data/time points')  return None  def smooth(x,window_len=11,window='hanning'):  '''smooth the data (from online resources);  credit/citation goes to https://scipy-cookbook.readthedocs.io/items/SignalSmooth.html  '''  if window_len<3:  return x  ss=np.r_[x[window_len-1:0:-1],x,x[-2:-window_len-1:-1]]  if window == 'flat': #moving average  w=np.ones(window_len,'d')  else:  w=eval('np.'+window+'(window_len)')  y=np.convolve(w/w.sum(),ss,mode='valid')  return y  def calc_deriv(t, ys, deriv_order=1, sw=11):  '''calculate the derivative; note that ys is an array for the data from multiple wells (we need the raw data to get the errors)  ==== Parameters ====  * t: time (1d array)  * ys: list of single-well data (list of 1d array)  * deriv_order: order of derivative (default: 1); use only 1 or 2.  * sw: smooth window size (default: 11)  ==== Returns ====  * t: time  * dys: average of derivatives  * err_dys: error of derivatives (standard error of the mean)  '''  dt = t[1]-t[0]  dys = []  for y in ys:  if deriv_order == 1:  dys.append(np.diff(smooth(y, sw))/dt)  elif deriv_order==2:  dys.append(np.diff(smooth(np.diff(smooth(y, sw))/dt, sw))/dt)  else:  print('Higher order derivatives are not supported')  dys.append(np.diff(smooth(y, sw))/dt)  dys = np.array(dys)  return (t, dys.mean(axis=0)[:len(t)], dys.std(axis=0)[:len(t)]/np.sqrt(len(ys)))  def get_peak_info(t, y):  res = []  peaks, _ = find_peaks(y, height=np.max(y)/2.0)  for p in peaks:  res.append([t[p], y[p]])  return np.array(res)  # %% Absorption of two example samples  plt.figure(figsize=(5,4))  t1, s1, e1 = calc_stats('s1_od.txt', 'blank_od.txt')  plt.errorbar(t1, s1, e1, fmt='o-',capsize=4, ms=12, mew=2,  elinewidth=2, color='tab:blue', mfc='none', label='S1')  t2, s2, e2 = calc_stats('s2_od.txt', 'blank_od.txt')  plt.errorbar(t2, s2, e2, fmt='s-',capsize=4, ms=12, mew=2,  elinewidth=2, color='tab:orange', mfc='none', label='S2')  plt.xlabel('Time (hr)')  plt.ylabel('A (a.u.)')  plt.legend()  plt.tight_layout()  plt.savefig('./fig_abs_vs_t.pdf')  # %% Fluorescence of two example samples  plt.figure(figsize=(5,4))  scfac = 1e5  t1, s1, e1 = calc_stats('s1_fl.txt', 'blank_fl.txt')  plt.errorbar(t1, s1/scfac, e1/scfac, fmt='o-',ms=12, mew=2, capsize=4,  elinewidth=2, color='tab:blue', mfc='none',label='S1')  t2, s2, e2 = calc_stats('s2_fl.txt', 'blank_fl.txt')  plt.errorbar(t2, s2/scfac, e2/scfac, fmt='s-',ms=12, mew=2, capsize=4,  elinewidth=2, color='tab:orange', mfc='none',label='S2')  plt.xlabel('Time (hr)')  plt.ylabel(r'F ($\times 10^5$ a.u.)')  plt.legend()  plt.tight_layout()  plt.savefig('./fig_fl_vs_t.pdf')  # %% derivative of absorption of two example samples  t,s,e = calc_stats('s1_od.txt', 'blank_od.txt')  sample = remove_baseline_from_data('s1_od.txt', 'blank_od.txt')  ys = [sample[:,col] for col in range(sample.shape[-1])]  t1, d1, e1 = calc_deriv(t, ys, deriv_order=1, sw=11)  p1 = get_peak_info(t1, d1)[0]  t,s,e = calc_stats('s2_od.txt', 'blank_od.txt')  sample = remove_baseline_from_data('s2_od.txt', 'blank_od.txt')  ys = [sample[:,col] for col in range(sample.shape[-1])]  t2, d2, e2 = calc_deriv(t, ys, deriv_order=1, sw=11)  p2 = get_peak_info(t2, d2)[0]  scfac = 1  plt.figure(figsize=(5,4))  plt.errorbar(t1, d1/scfac, e1/scfac, fmt='o-',ms=12, mew=2, capsize=4,  elinewidth=2, color='tab:blue', mfc='none',label='S1')  plt.errorbar(t2, d2/scfac, e2/scfac, fmt='s-',ms=12, mew=2, capsize=4,  elinewidth=2, color='tab:orange', mfc='none',label='S2')  plt.xlabel('Time (hr)')  plt.ylabel(r'dA/dt (a.u.)')  ylim = plt.ylim()  plt.plot([p1[0],p1[0]],ylim, '--', color='black', zorder=99)  plt.plot([p2[0],p2[0]],ylim, '--', color='black', zorder=99)  print(p1, p2, p2-p1)  plt.ylim(ylim)  # plt.legend()  plt.tight_layout()  plt.savefig('./fig_dA_vs_t.pdf')  # %% derivative of fluorescence of two example samples  t,s,e = calc_stats('s1_fl.txt', 'blank_fl.txt')  sample = remove_baseline_from_data('s1_fl.txt', 'blank_fl.txt')  ys = [sample[:,col] for col in range(sample.shape[-1])]  t1, d1, e1 = calc_deriv(t, ys, deriv_order=2, sw=11)  p1 = get_peak_info(t1, d1)[0]  t,s,e = calc_stats('s2_fl.txt', 'blank_fl.txt')  sample = remove_baseline_from_data('s2_fl.txt', 'blank_fl.txt')  ys = [sample[:,col] for col in range(sample.shape[-1])]  t2, d2, e2 = calc_deriv(t, ys, deriv_order=2, sw=11)  p2 = get_peak_info(t2, d2)[0]  scfac = 1e5  plt.figure(figsize=(5,4))  plt.errorbar(t1, d1/scfac, e1/scfac, fmt='o-',ms=12, mew=2, capsize=4,  elinewidth=2, color='tab:blue', mfc='none',label='S1')  plt.errorbar(t2, d2/scfac, e2/scfac, fmt='s-',ms=12, mew=2, capsize=4,  elinewidth=2, color='tab:orange', mfc='none',label='S2')  plt.xlabel('Time (hr)')  plt.ylabel(r'd$^2$F/dt$^2$ ($\times 10^5$ a.u.)')  ylim = plt.ylim()  plt.plot([p1[0],p1[0]],ylim, '--', color='black', zorder=99)  plt.plot([p2[0],p2[0]],ylim, '--', color='black', zorder=99)  plt.ylim(ylim)  print(p1, p2, p2-p1)  # plt.legend()  plt.tight_layout()  plt.savefig('./fig_dF_vs_t.pdf') |
| --- |
